# Supplementary material for: Oxygen Defects Containing TiN Films for the Hydrogen Evolution Reaction: A Robust Thin Film Electrocatalyst With Outstanding Performance
Source: Preprints.org preprint supplement (doi:10.20944/preprints202403.1821.v1), 2024-03-29
Supplement: Supplementary file 1 [file supplementary]

Supporting Information

Oxygen defects containing TiN films for the hydrogen evolution reaction: a robust thin film electrocatalyst with outstanding performance

Ayoub Laghrissi and Mohammed Es-Souni *

A. Laghrissi1
1Currently with the Technical Faculty, Mads Clausen

Institute, University of Southern Denmark, 6400 Sønderborg

Prof. Dr. habil. M. Es-Souni
Institute for Materials & Surface Technology,
Honorary Member, Kiel University of Applied Sciences
Sokrates Platz 1, D-24149 Kiel, Germany
E-mail: mohammed.es-souni@fh-kiel.de


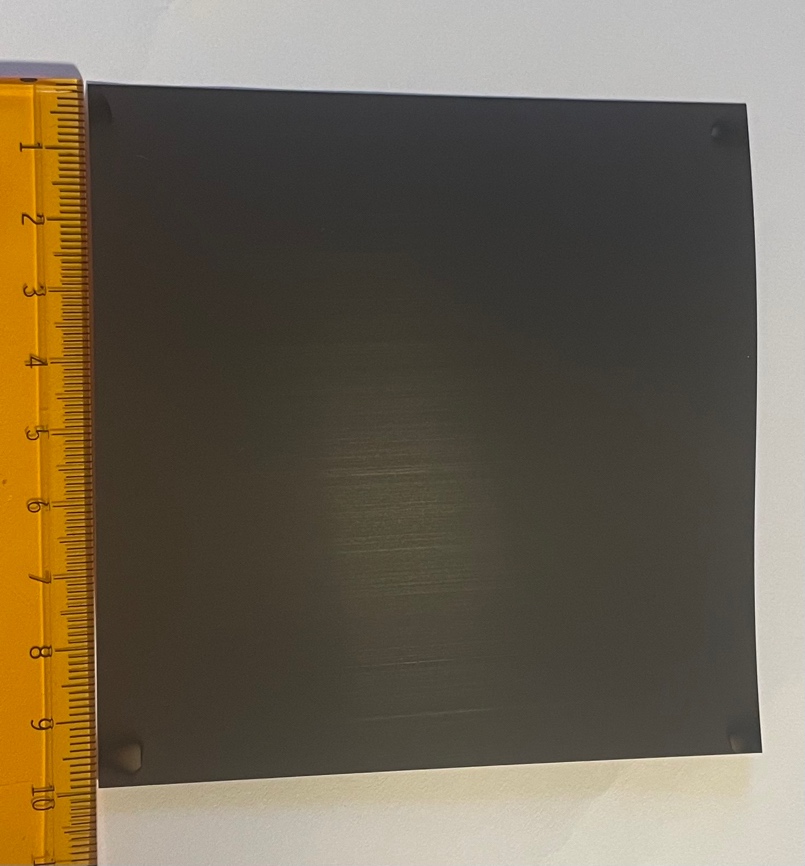


**Figure S1**: a photograph of a large area TiNO film deposited on a Ti sheet.


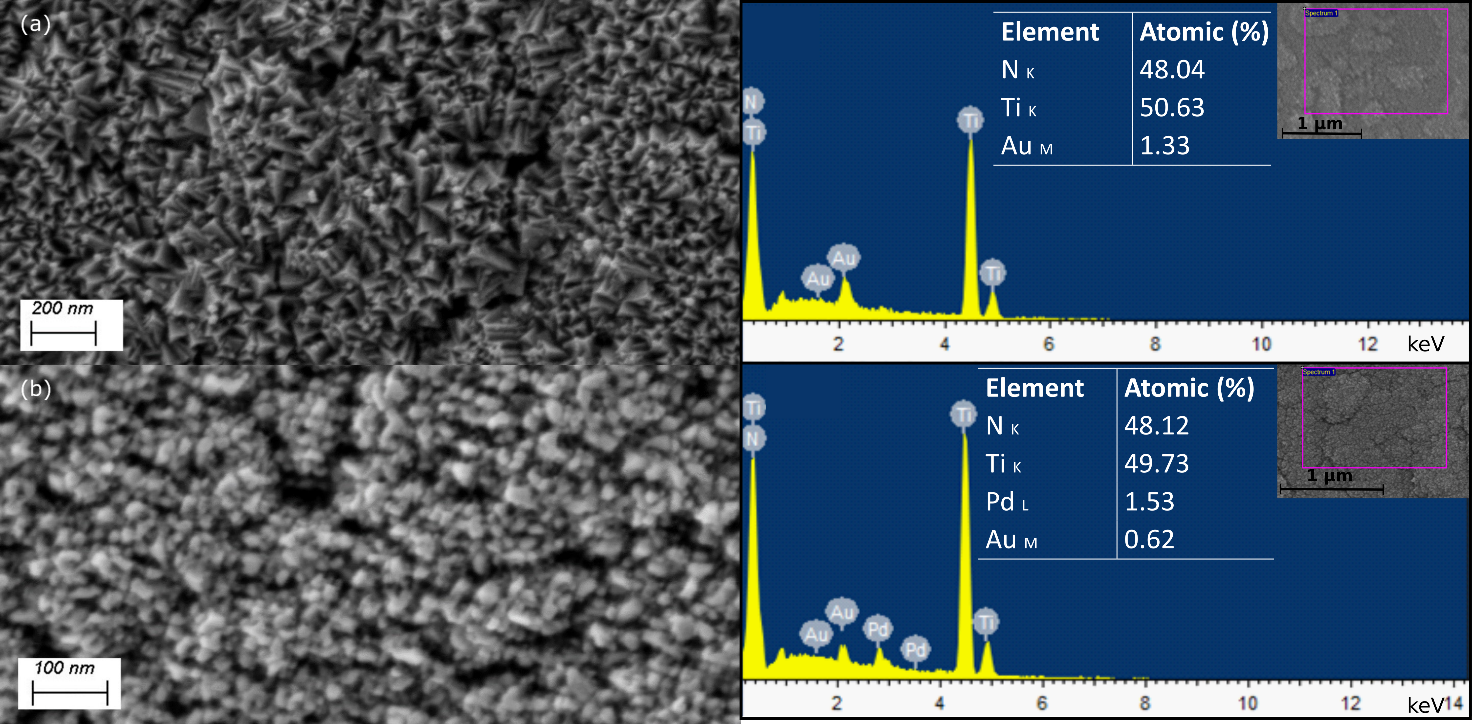


**Figure S2:** Top view secondary electron (SE) micrographs of TiN (a) and TiN-PdNPs (b) together with their EDS analysis after HER studies.
